# Supplementary material for: Near Real Time Arctic sea ice thickness and volume from CryoSat-2
Source: Copernicus journal article supplement (doi:10.5194/tc-2016-21), 2016-02-02
Supplement: Supplementary file [file tc-2016-21-AC2-supplement.pdf]

Hi Charlie. Thank you for your interest in our data. We are able to produce data for seven months of the year, over the Arctic sea ice growth season. Throughout this period the dominant signal in sea ice thickness changes will be due to seasonal variations. CryoSat-2 was launched in 2010 so our time series is currently not long enough to produce data that show long-term interannual changes in the sea ice thickness, or to comment on trends. This is why we need the CryoSat-2 mission to continue or to be followed by similar missions, so that we can start to produce the data that you require, and that will be of great interest to the community.
